# Supplementary material
Source: HighWire-hosted journal article supplement (https://www.ajnr.org/highwire/filestream/96718/field_highwire_adjunct_files/0/0522.pdf)
Supplement: 0522.pdf [file 0522.pdf]

Table 1: Demographic characteristics

## Demographic Characteristics

| Variable                               | Fixed-timing Cohort<br>(n=153) | Case-Specific Cohort<br>(n=157) | P value |
|----------------------------------------|--------------------------------|---------------------------------|---------|
| Age (years) (mean $\pm$ SD)            | 66 $\pm$ 15                    | 68 $\pm$ 15                     | 0.21    |
| Male (n, %)                            | 88 (58%)                       | 75 (48%)                        | 0.08    |
| Race (n, %)                            |                                |                                 | 0.32    |
| Asian                                  | 26 (17%)                       | 13 (8%)                         |         |
| Black                                  | 12 (8%)                        | 16 (10%)                        |         |
| Hispanic                               | 3 (2%)                         | 4 (3%)                          |         |
| Native American                        | 3 (2%)                         | 3 (2%)                          |         |
| White                                  | 104 (68%)                      | 117 (75%)                       |         |
| Unknown                                | 5 (3%)                         | 4 (2%)                          |         |
| rLVEF                                  | 24 (16%)                       | 31 (20%)                        | 0.38    |
| Atrial fibrillation                    | 65 (42%)                       | 70 (45%)                        | 0.73    |
| Hypertension                           | 103 (67%)                      | 105 (67%)                       | >0.99   |
| Diabetes mellitus                      | 50 (33%)                       | 33 (21%)                        | 0.022   |
| Hyperlipidemia                         | 71 (46%)                       | 59 (38%)                        | 0.13    |
| NIHSS at admission (median [IQR])      | 16 (7, 24)                     | 17 (10, 23)                     | 0.36    |
| Underwent MRI                          | 128 (84%)                      | 130 (83%)                       | 0.88    |
| MRI positive for stroke                | 115 (90%)                      | 123 (95%)                       | 0.17    |
| MRI Negative for stroke                | 13 (10%)                       | 7 (5%)                          |         |
| Large Vessel Occlusion                 | 109 (71%)                      | 157 (100%)                      | <0.001  |
| Mechanical Thrombectomy                | 68 (44%)                       | 77 (49%)                        | 0.43    |
| TICI Scores                            |                                |                                 | 0.34    |
| 0                                      | 10 (15%)                       | 8 (10%)                         |         |
| 1                                      | 2 (3%)                         | 1 (1%)                          |         |
| 2A                                     | 5 (8%)                         | 3 (4%)                          |         |
| 2B                                     | 20 (30%)                       | 28 (36%)                        |         |
| 2C                                     | 0 (0%)                         | 4 (5%)                          |         |
| 3                                      | 29 (44%)                       | 33 (43%)                        |         |
| Average CBF <30%                       | 22.9                           | 35.5                            |         |
| Any volume                             | 84 (55%)                       | 104 (66%)                       | 0.048   |
| Volume, if present (mL) (median [IQR]) | 24 (11, 68)                    | 24 (9, 70)                      | 0.84    |
| Average Tmax > 6s                      | 97.5                           | 123.8                           |         |
| Any volume                             | 126 (82%)                      | 143 (91%)                       | 0.029   |
| Volume, if present (mL) (median [IQR]) | 102 (55, 170)                  | 118 (6, 167)                    | 0.51    |
| Average Mismatch ratio                 | 7 (2, infinite)                | 8 (2, infinite)                 | 0.87    |

NIHSS: National Institutes of Health Stroke Scale; SD: standard deviation; IQR: inter-quartile range.
